# Supplementary material for: Aggregating in vitro-grown adipocytes to produce macroscale cell-cultured fat tissue with tunable lipid compositions for food applications
Source: eLife. 2023 Apr 4;12:e82120. doi: 10.7554/eLife.82120 (PMC10072877; doi:10.7554/eLife.82120)
Supplement: Supplementary file 1. [file elife-82120-supp1.xlsx]

## Sheet: Sheet1
Image	Nuclei Count	PPARg Count	%
1	1144	1000	0.874126
2	1148	916	0.797909
3	1188	1003	0.844276
4	1292	967	0.748452
		Mean	0.816191
		SD	0.0549788
		SEM	0.0109958
