# Supplementary material for: Aggregating in vitro-grown adipocytes to produce macroscale cell-cultured fat tissue with tunable lipid compositions for food applications
Source: eLife. 2023 Apr 4;12:e82120. doi: 10.7554/eLife.82120 (PMC10072877; doi:10.7554/eLife.82120)
Supplement: Supplementary file 2. [file elife-82120-supp2.xlsx]

## Sheet: Sheet1
Lipid Droplet Diameters (% of all Lipid Droplets Counted)
Diameter (Microns)	15 Days	30 Days
0-5	14.9422	16.7809
5-10	65.7801	45.6684
10-15	12.6825	16.3758
15-20	3.95718	8.56965
20-25	1.58936	4.76784
25-30	0.735215	3.646
30-35	0.237864	1.79184
35-40	0.0648719	1.27766
≥40	0.010812	1.12184
Chi-Square Value: 1052, p = <0.0001
